# Supplementary material
Source: bioRxiv or medRxiv preprint supplement (https://www.biorxiv.org/highwire/filestream/109569/field_highwire_adjunct_files/0/362335-1.pdf)
Supplement: Supplementary file [file 362335-1.pdf]

**Supplementary Information:**  
**Structural analysis of the interaction between the bacterial  
cell division proteins FtsQ and FtsB**

Danguole Kureisaite-Ciziene<sup>1,j</sup>, Aravindan Varadajan<sup>2,j</sup>, Stephen H. McLaughlin<sup>1</sup>,  
Marjolein Glas<sup>2</sup>, Alejandro Montón Silva<sup>2</sup>, Rosa Luirink<sup>2</sup>, Carolin Mueller<sup>2</sup>,  
Tanneke den Blaauwen<sup>3</sup>, Tom N. Grossmann<sup>2</sup>, Joen Luirink<sup>2\*</sup>, Jan Löwe<sup>1\*</sup>

**Content:**

Supplementary Figures 1-6

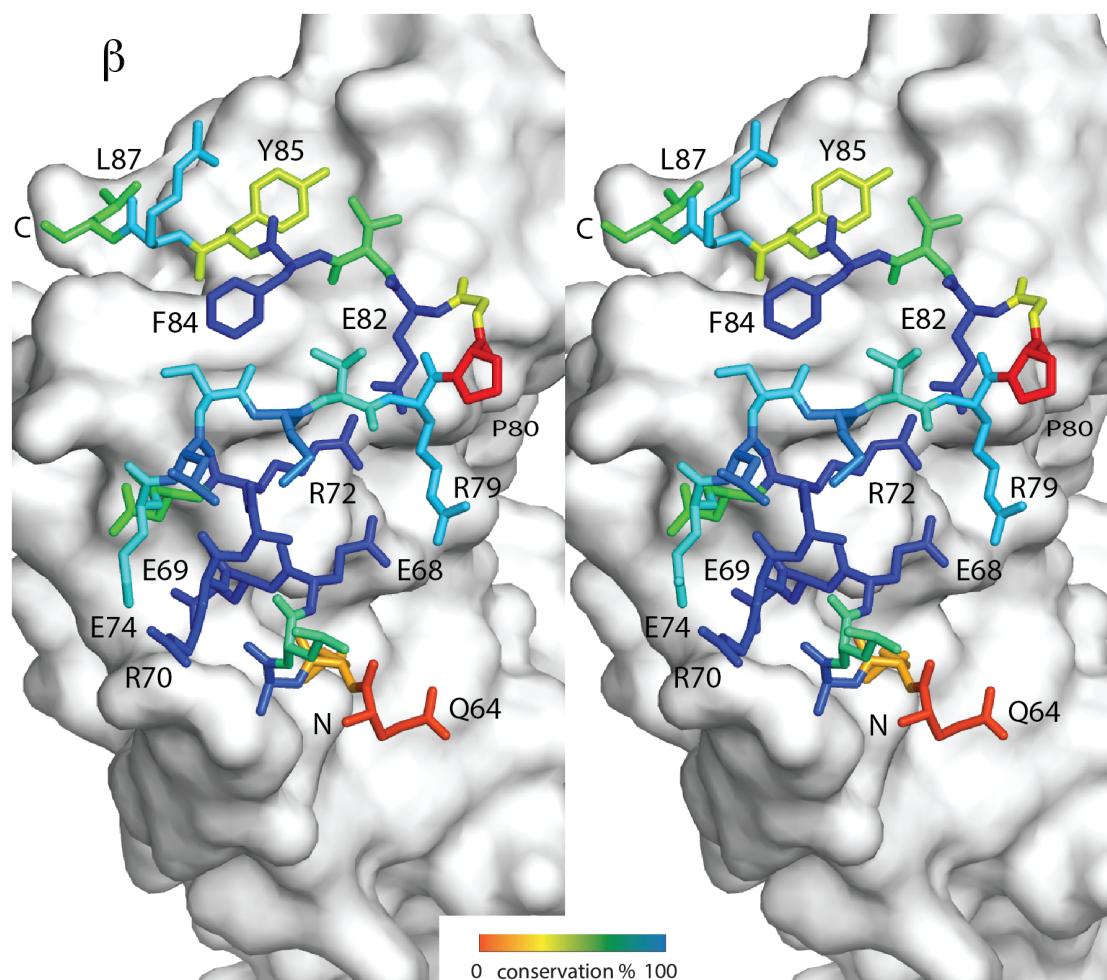

**Supplementary Figure S1.** Sequence conservation-based colouring of FtsB surface, shown in stereo. Around 100 sequences similar to *E. coli* FtsB (database ID FTSB\_ECOLI) were identified using BLAST and sequence conservation was determined from a CLUSTAL OMEGA multiple sequence alignment with CONSURF (<http://consurf.tau.ac.il/2016/>). FtsB residues 64-87 are shown as a stick model coloured by conservation from blue (most conserved residues in the alignment) to red (least conservation). FtsQ is shown as a grey molecular surface. All residues involved in major interactions with FtsQ are conserved in FtsB, in addition to internal interactions, such as R72 - E82.

| N-terminus | formula, sequence                                                                | mw [g*mol <sup>-1</sup> ] | calculated m/z                      | found m/z                        |
|------------|----------------------------------------------------------------------------------|---------------------------|-------------------------------------|----------------------------------|
| Ac         | $C_{126}H_{203}N_{39}O_{41}$<br>QEALEERARNELS(Nle)<br>TRPGETFYRL-NH <sub>2</sub> | 2919.5                    | 1460.25 / 973.83<br>730.63 / 584.7  | 1461.0 / 974.3 /<br>731.0        |
| FITC PEG   | $C_{151}H_{223}N_{41}O_{48}$<br>QEALEERARNELS(Nle)<br>TRPGETFYRL-NH <sub>2</sub> | 3411.6                    | 1706.3 / 1137.87<br>853.65 / 683.12 | 1707.2 / 1138.3<br>854.0 / 638.3 |

a)

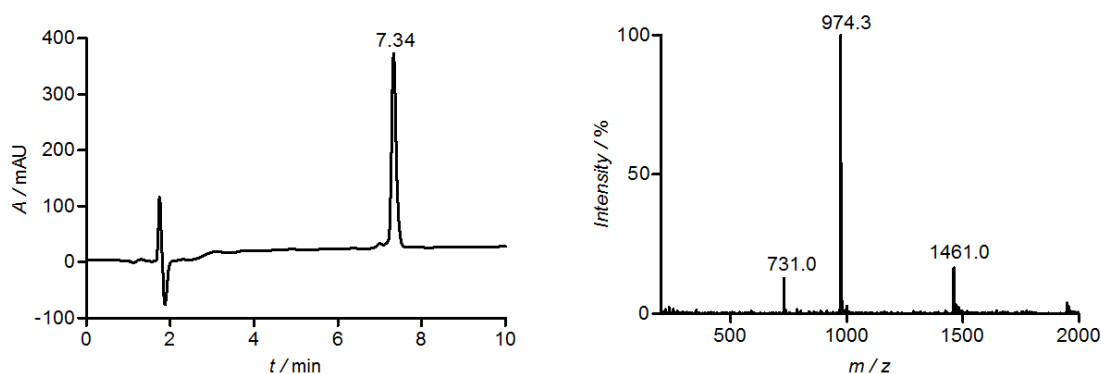

b)

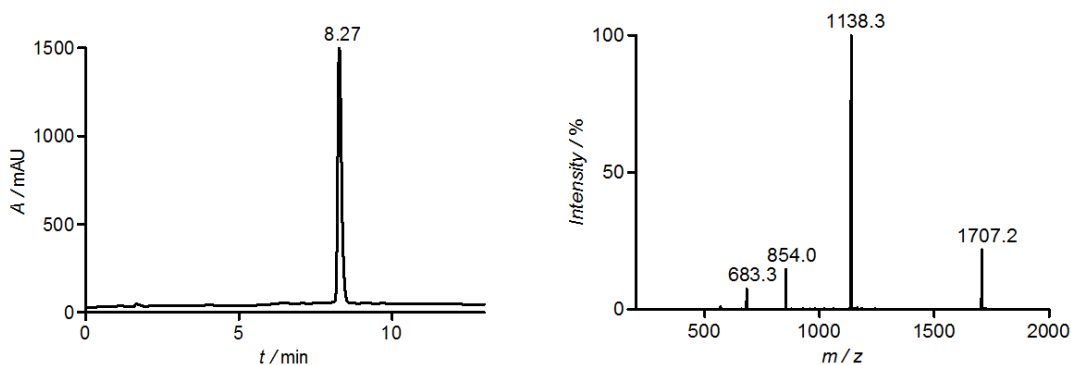

**Supplementary Figure S2.** Table: peptide characteristics (molecular formula, one-letter code sequence, molecular weight, calculated and detected m/z ratios for multi charged masspec ions  $[M+nH]^{n+}$ ). Abbreviations: Ac: acetyl; FITC: fluoresceinisothiocyanat fluorophore; PEG: 8-amino-3,6-dioxaoctanoyl linker; Nle: norleucine amino acid replacing methionine 77. **A)** HPLC chromatogram at 210 nm of peptide used for co-crystallisation with FtsQ (Figure 3D), gradient: 20-50 % ACN in 10 min and mass spectra of corresponding peptide. **B)** HPLC chromatogram at 210 nm of FITC PEG peptide for fluorescence polarisation (Figure 3D), gradient: 30-60 % ACN in 10 min, starting at 3 minutes and mass spectra of corresponding peptide.

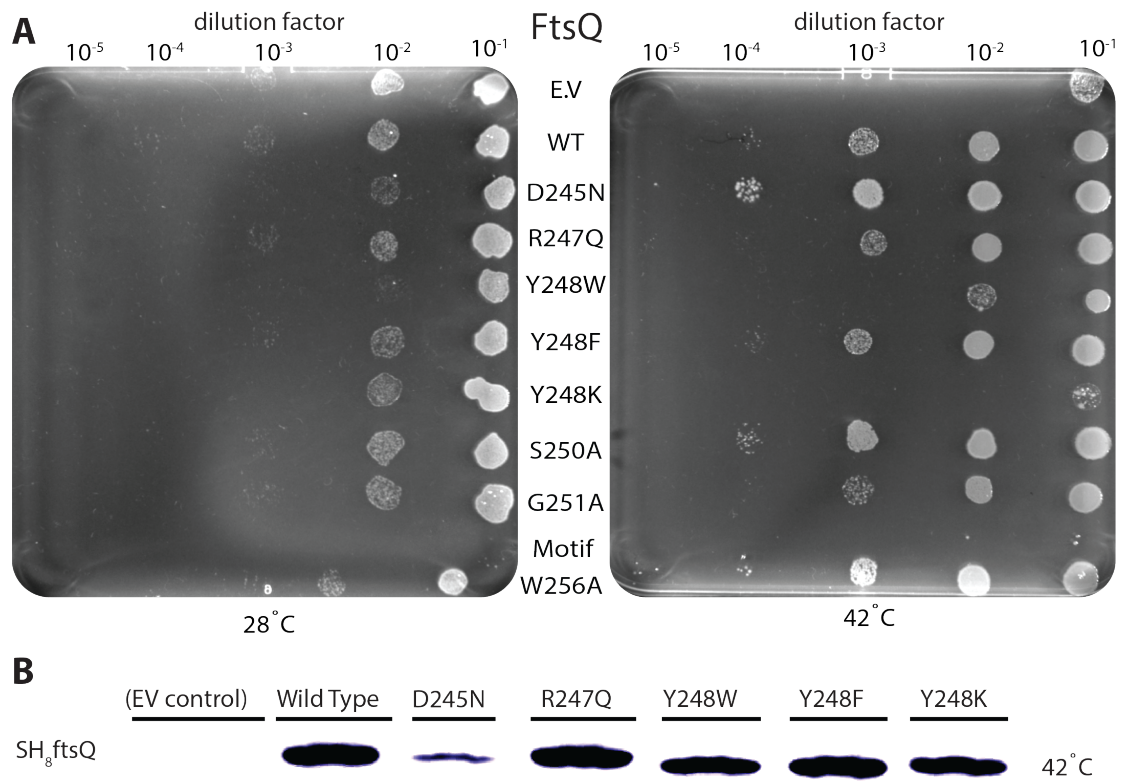

**Supplementary Figure S3.** A) Spot assay of FtsQ mutants used in Figure 4A. B) Western blot showing expression levels of FtsQ mutants used in A).

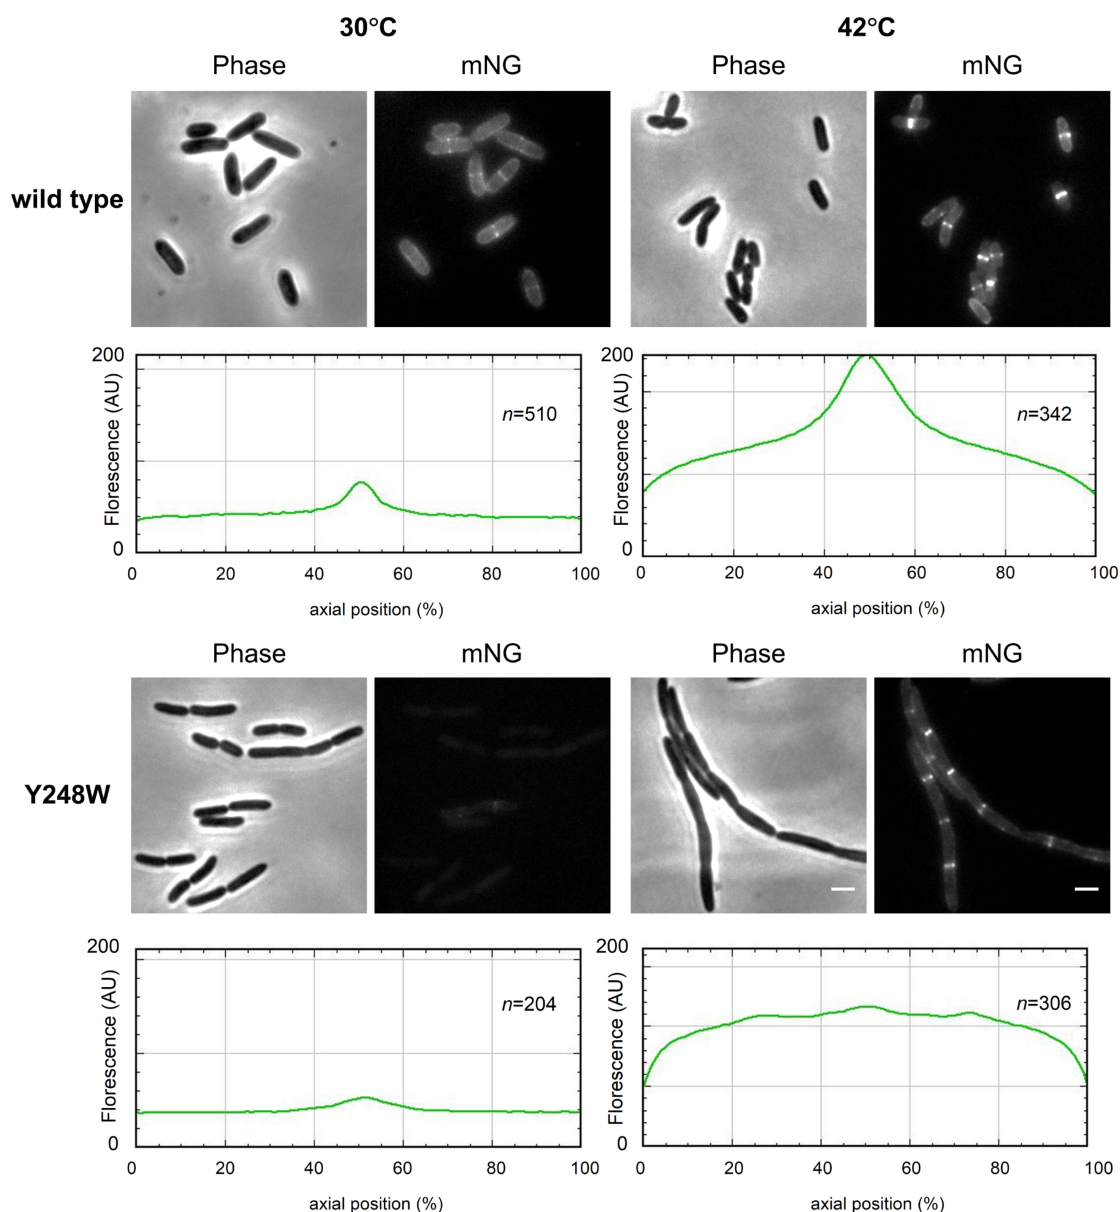

**Supplementary Figure S4.** Fluorescence microscopy localisation of FtsQ (Y248W) mutant protein in *E. coli* cells. Phase contrast images, fluorescent images and fluorescence profiles per cell (from 0 to 200 AU) plotted against normalised cell length (from 0 to 100 %) of ts FtsQ LMC531 strain expressing wild type FtsQ or FtsQY248W fused to mNeonGreen (mNG) at 30 or 42°C. *n* indicates number of cells. The graphs show the average total fluorescence per cell plotted against the normalised cell length. Filaments have therefore a higher fluorescence per cell. In addition, the expression of the proteins is higher at the non-permissive temperature. Scale bar represents 2  $\mu\text{m}$ .

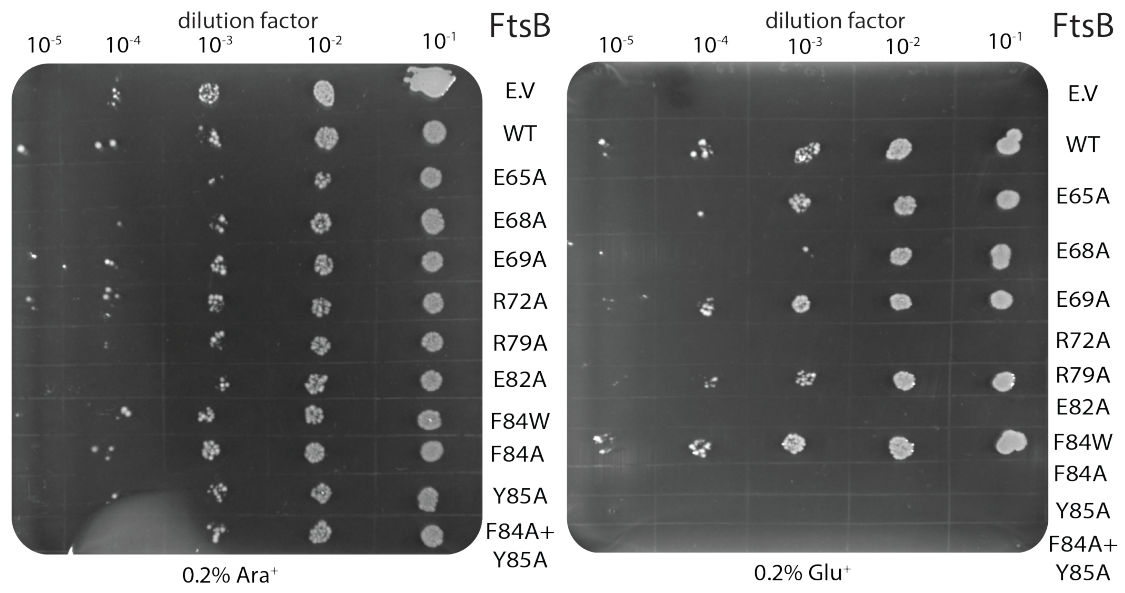

**Supplementary Figure S5.** Spot assay showing FtsB mutants used in Figure 4B.

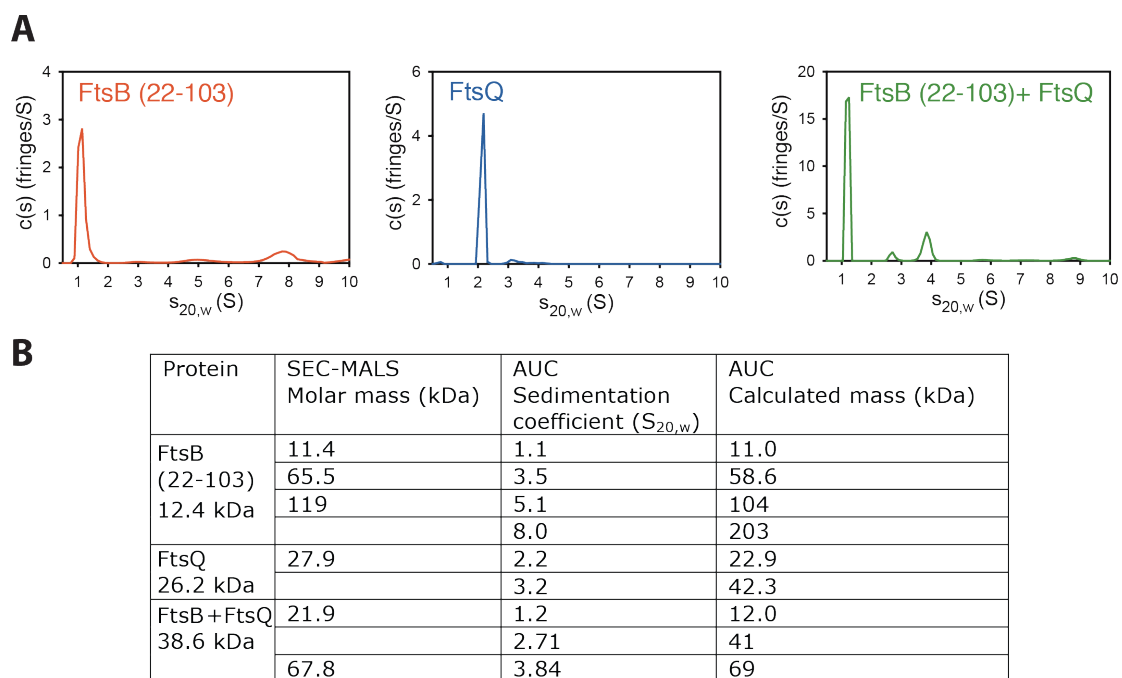

**Supplementary Figure S6.** A) Analytical ultracentrifugation (AUC) of FtsQ, FtsB and in complex. B) Summary table of SEC-MALS (Figure 5A) and AUC data (panel A) describing the properties of FtsQ, FtsB and their complexes.
